# Supplementary material for: Low awareness and common misconceptions about schistosomiasis in endemic lowland areas in Western Ethiopia: a mixed-methods study
Source: Springer Nature journal article supplement (doi:10.1186/s12889-021-11106-y), 2021-06-04
Supplement: MOESM3 [file 19230492]

**Low awareness and common misconceptions about schistosomiasis in endemic lowland areas in western Ethiopia. A mixed-methods study.**

**Observations guide**

**1. Schistosoma infection risky behaviors and practices observation guideline** a. Use of latrine vs open filed defecation

b. Availability and functionality of latrines

c. Contact habits with water bodies

d. Source of drinking water

a. Kato-Katz materials and other possible methods?

b. Praziquantel?

c. Registered schistosomiasis cases?

d. Guidelines on schistosomiasis diagnosis, treatment and prevention?

Name of woreda: \_\_\_\_\_

Name of village: \_\_\_\_\_

**2. Availability of schistosomiasis diagnosing and treating materials in health facilities**

Name of woreda: \_\_\_\_\_

Name of village: \_\_\_\_\_

Name of health facility: \_\_\_\_\_
