# Supplementary material for: Low awareness and common misconceptions about schistosomiasis in endemic lowland areas in Western Ethiopia: a mixed-methods study
Source: Springer Nature journal article supplement (doi:10.1186/s12889-021-11106-y), 2021-06-04
Supplement: MOESM5 [file 19230492]

*Authors' information*

1. Berhanu Erko Roro: [berhanue@yahoo.com](mailto:berhanue@yahoo.com)
2. Svein Gunnar Gundersen: [s.g.gundersen@gmail.com](mailto:s.g.gundersen@gmail.com)
3. Girmay Medhin Tesfay: [gtmedhin@yahoo.com](mailto:gtmedhin@yahoo.com)
4. Nega Berhe Belay: [nega.berhe.belay@mail.com](mailto:nega.berhe.belay@mail.com)
